# Supplementary material
Source: Springer Nature journal article supplement (https://www.springermedizin.de/resource/supplementary/12888_2008_514_MOESM2_ESM.pdf/9483474)

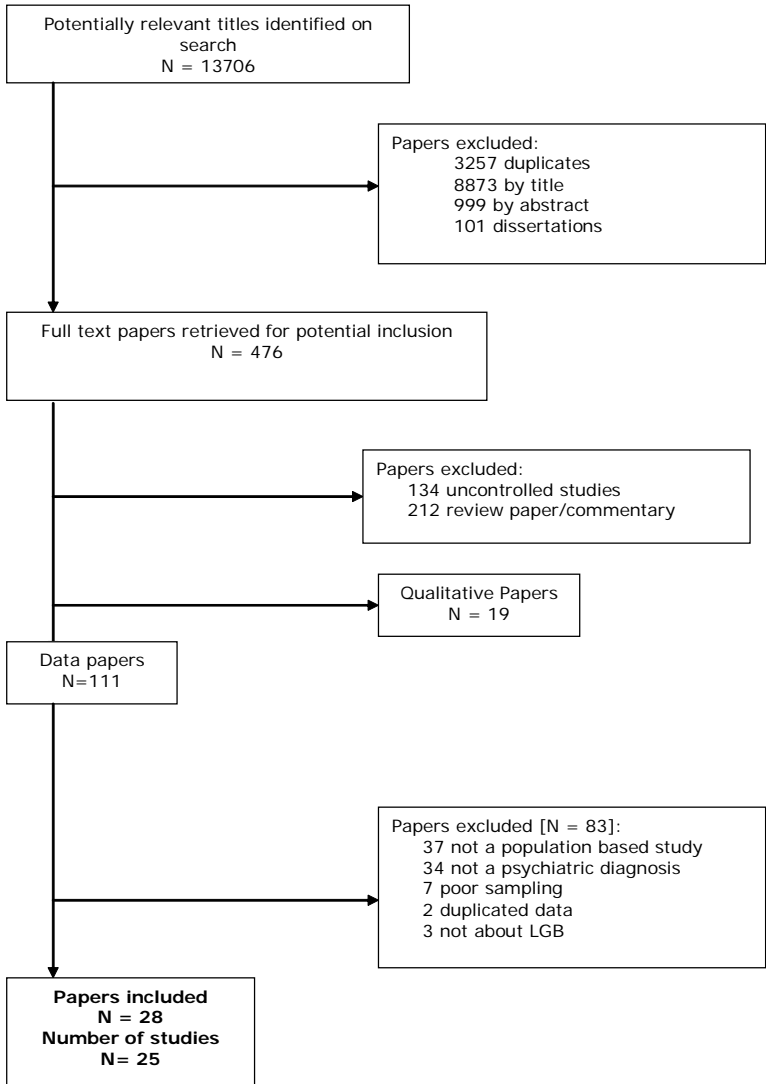

Supplement: MOESM2 [file 9483474]
